# Supplementary material for: Catalyst-free, highly selective synthesis of ammonia from nitrogen and water by a plasma electrolytic system
Source: PubMed Central journal article supplement — Sci Adv. 2019 Jan 11;5(1):eaat5778. doi: 10.1126/sciadv.aat5778 (PMC6357762; doi:10.1126/sciadv.aat5778), 2019-01-11
Supplement: aat5778_SM.pdf [file aat5778_SM.pdf]

## Supplementary Materials for

### Catalyst-free, highly selective synthesis of ammonia from nitrogen and water by a plasma electrolytic system

Ryan Hawtof, Souvik Ghosh, Evan Guarr, Cheyan Xu, R. Mohan Sankaran\*, Julie Nicole Renner\*

\*Corresponding author. Email: mohan@case.edu (R.M.S.); julie.renner@case.edu (J.N.R.)

Published 11 January 2019, *Sci. Adv.* **5**, eaat5778 (2019)

DOI: 10.1126/sciadv.aat5778

#### This PDF file includes:

Equation for faradaic efficiency calculation for NH<sub>3</sub> from NH<sub>3</sub> measurements

Equation for instantaneous faradaic efficiency calculation for NH<sub>3</sub> from H<sub>2</sub> measurements

Equation for faradaic NH<sub>3</sub> concentration

Equation for energy consumption

Fig. S1. Representative current waveforms measured in the plasma electrolytic system during NH<sub>3</sub> synthesis.

Fig. S2. RGA measurements of mass/charge ratio ( $m/z$ ) = 2 and 17, corresponding to H<sub>2</sub> and NH<sub>3</sub> partial pressure, at 2 mA in a plasma electrolytic reactor by analyzing exhaust gas from cell as a function of time.

Fig. S3. H<sub>2</sub> production in the plasma electrolytic system.

Fig. S4. Schematic of the hybrid plasma electrolytic system in a split H-cell geometry.

Fig. S5. Comparison of NO<sub>x</sub> produced with that predicted from O<sub>2</sub> gas evolution in plasma electrolytic system.

Fig S6. Heating of solution in the plasma electrolytic system.

Fig. S7. Representative fluorescence assay calibration used to determine NH<sub>3</sub> produced.

Fig. S8. Representative fluorescence assay calibration used to determine NO<sub>x</sub> produced.

Table S1A. Summary of NH<sub>3</sub> produced by plasma electrolytic synthesis for the following configurations: N<sub>2</sub> both flowing through the cathode tube where the plasma is normally generated and bubbled through the solution to purge, but no electrical power applied, Ar as both the supply gas in the plasma and purge gas, Ar as the supply gas in the plasma and N<sub>2</sub> as the purge gas, and N<sub>2</sub> as both the supply gas in the plasma and purge gas.

Table S1B. Summary of one-sample and two-sample *t* tests carried out on datasets in table S1A.

Table S2A. Summary of NH<sub>3</sub> produced and faradaic efficiencies by plasma electrolytic synthesis after different processing times.

Table S2B. Summary of one-sample and two-sample *t* tests carried out on datasets in table S2A.

Table S3A. Summary of NH<sub>3</sub> produced and faradaic efficiencies by plasma electrolytic synthesis at different currents.

Table S3B. Summary of one-sample and two-sample *t* tests carried out on datasets in table S3A.

Table S3C. Summary of H<sub>2</sub> produced in plasma electrolytic reactor by analyzing exhaust gas using GC.

Table S4A. Summary of NH<sub>3</sub> produced and faradaic efficiencies by plasma electrolytic synthesis in a split cell.

Table S4B. Summary of two-sample *t* tests carried out on datasets in table S4A (and tables S2A and S3A).

Table S5A. Summary of NH<sub>3</sub> produced and faradaic efficiencies by plasma electrolytic synthesis at different pH values.

Table S5B. Summary of one-sample and two-sample *t* tests carried out on datasets in table S5A.

Table S6A. Summary of NH<sub>3</sub> produced and faradaic efficiencies by plasma electrolytic synthesis in the presence of NO<sub>3</sub> and NO<sub>2</sub> scavengers.

Table S6B. Summary of one-sample and two-sample *t* tests carried out on datasets in table S6A.

Table S7A. Summary of NO<sub>x</sub> produced by plasma electrolytic synthesis after different processing times and at different currents.

Table S7B. Summary of one-sample and two-sample *t* tests carried out on datasets in table S7A.

Table S8. Summary of voltages measured between the plasma cathode and the Pt anode as a function of the plasma current in the plasma electrolytic system.

### Equation for faradaic efficiency calculation for NH<sub>3</sub> from NH<sub>3</sub> measurements

$$\text{Faradaic efficiency (\%)} = \frac{\text{Experimentally measured } NH_3 \text{ concentration}}{\text{Faradaic } NH_3 \text{ concentration}} \times 100$$

### Equation for instantaneous faradaic efficiency calculation for NH<sub>3</sub> from H<sub>2</sub> measurements

$$\text{Instantaneous faradaic efficiency (\%)} = \left( 1 - \frac{\dot{V}C_{H_2}Fz}{(1000000 - C_{H_2})I} \right) \times 100$$

where  $\dot{V}$  is the nitrogen flow rate through the cell,  $C_{H_2}$  is the ppm hydrogen measured,  $F$  is Faraday's constant,  $z$  is the number of electrons and equal to 2 for hydrogen, and  $I$  is the plasma current in mA.

### Equation for faradaic NH<sub>3</sub> concentration

$$\text{Faradaic } NH_3 \text{ concentration} = \frac{Q}{F z V}$$

where  $Q$  is the total charge,  $F$  is Faraday's constant,  $z$  is the number of electrons and equal to 3 for the NH<sub>3</sub> reaction, and  $V$  is the volume of the solution and equal to 20 ml.

### Equation for energy consumption

$$\text{Energy consumption} = \frac{VI}{\dot{m}_{NH_3}}$$

where  $V$  and  $I$  are the plasma voltage and current in the electrolytic system, respectively, and  $I$  is calculated from the total charge divided by the time,  $Q/t$ , and  $\dot{m}_{NH_3}$  is the NH<sub>3</sub> production rate. Using units of kV for  $V$ , A for  $I$ , and kg/h for  $\dot{m}_{NH_3}$  gives the energy consumption in kWh/kg.

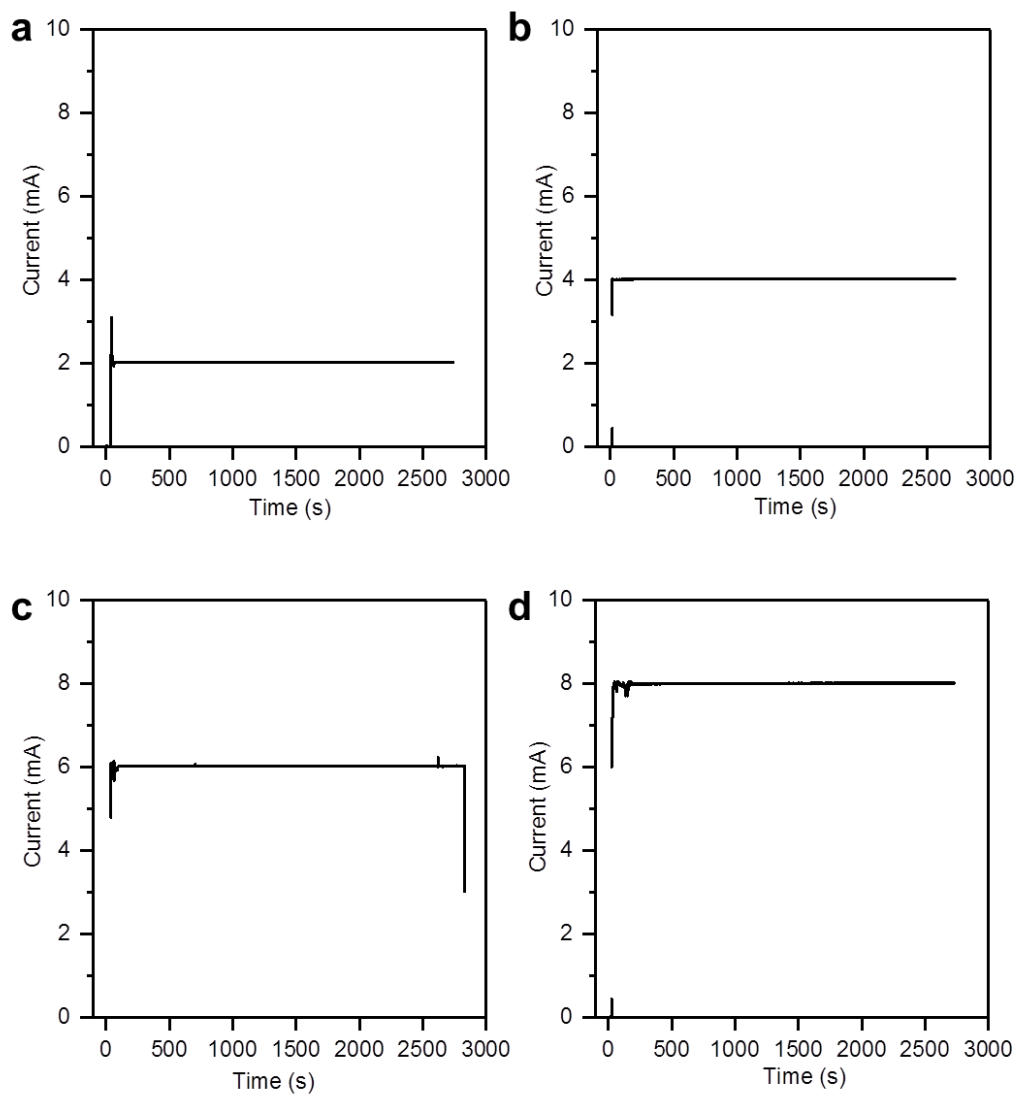

**Fig. S1. Representative current waveforms measured in the plasma electrolytic system during  $\text{NH}_3$  synthesis.** The current was integrated over the process time to obtain the total charge,  $Q = \int I(t)dt$ . For the four examples shown, the total charges were (a) 5448, (b) 10858, (c) 16717, and (d) 21647 mAs, respectively.

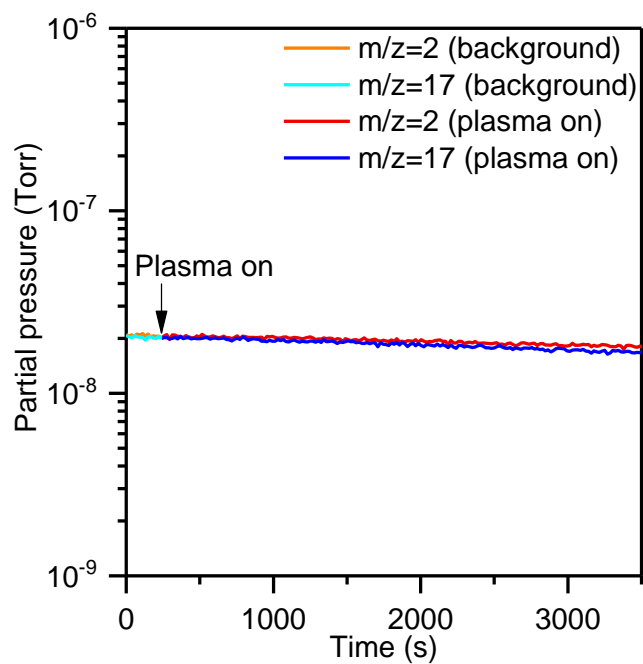

**Fig. S2. RGA measurements of mass/charge ratio ( $m/z$ ) = 2 and 17, corresponding to  $H_2$  and  $NH_3$  partial pressure, at 2 mA in a plasma electrolytic reactor by analyzing exhaust gas from cell as a function of time. The background signal was obtained for 240 s before turning on the plasma.**

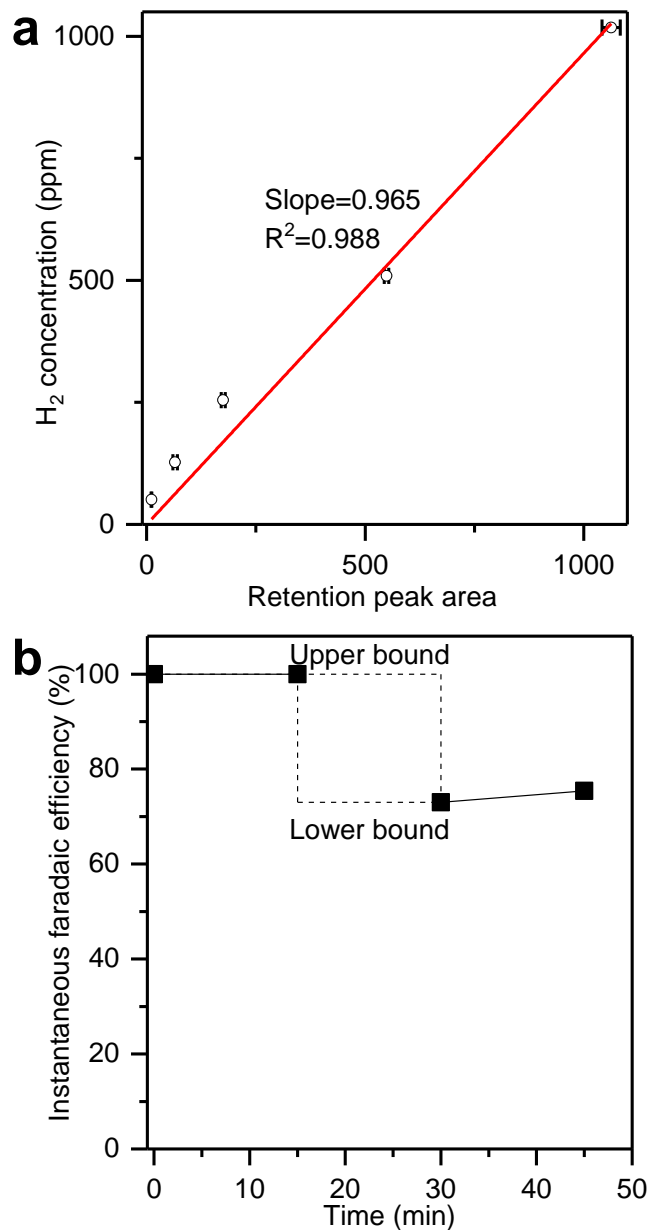

**Fig. S3. H<sub>2</sub> production in the plasma electrolytic system.** (a) Gas chromatography (GC) calibration of H<sub>2</sub> retention peak area and H<sub>2</sub> concentration. (b) Instantaneous faradaic efficiency from GC measurements of H<sub>2</sub> as a function of time, assuming the rest of the current goes towards NH<sub>3</sub> production. Two step functions are shown for estimating the cumulative faradaic efficiency which represent the lower and upper bound.

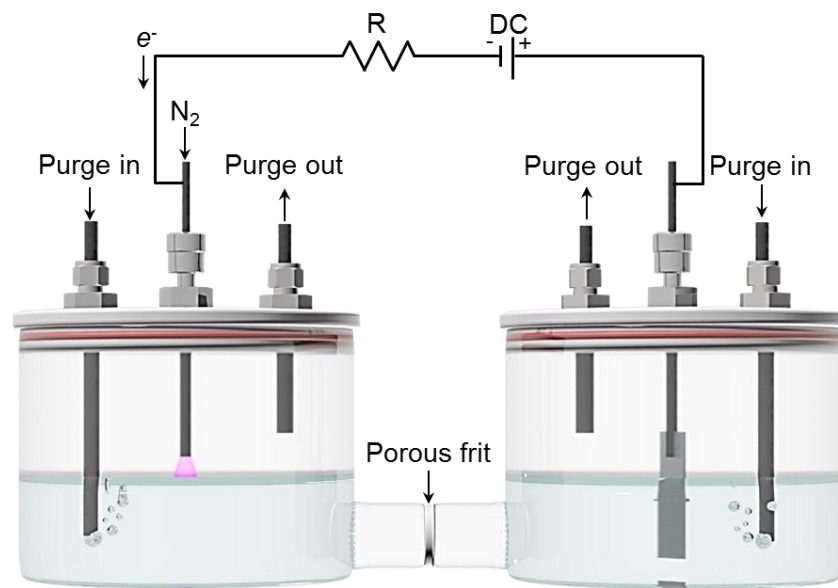

**Fig. S4. Schematic of the hybrid plasma electrolytic system in a split H-cell geometry.**

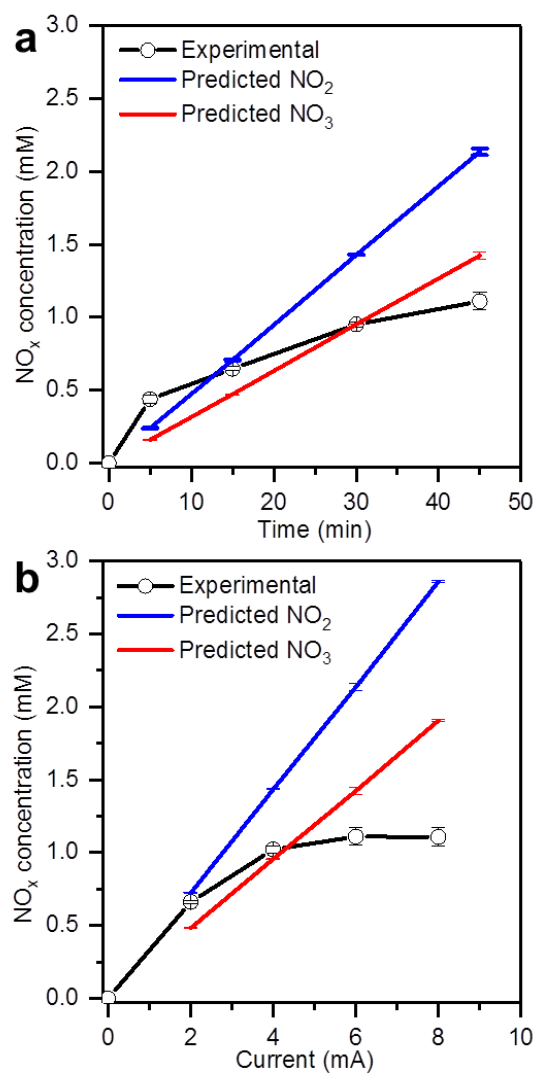

**Fig. S5. Comparison of NO<sub>x</sub> produced with that predicted from O<sub>2</sub> gas evolution in plasma electrolytic system.**



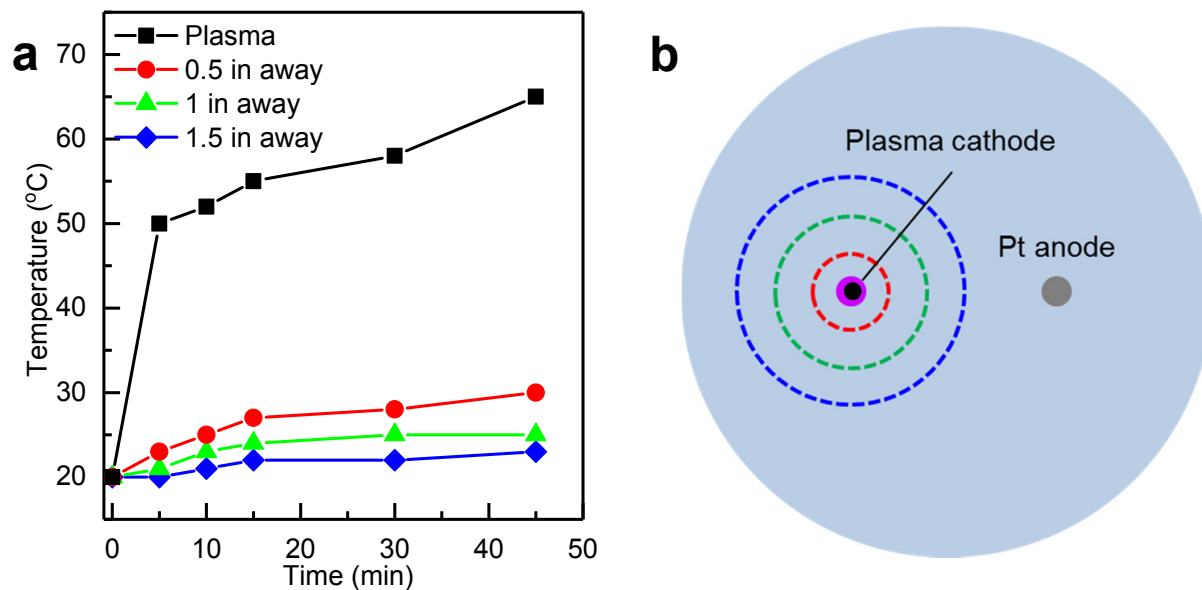

**Fig S6. Heating of solution in the plasma electrolytic system.** (a) Temperature measurements of solution surface as a function of position and time at 6 mA. (b) A color-coded illustration of the radially symmetric positions shown in (a) at which the temperature was measured with respect to the position of the plasma cathode and Pt anode.

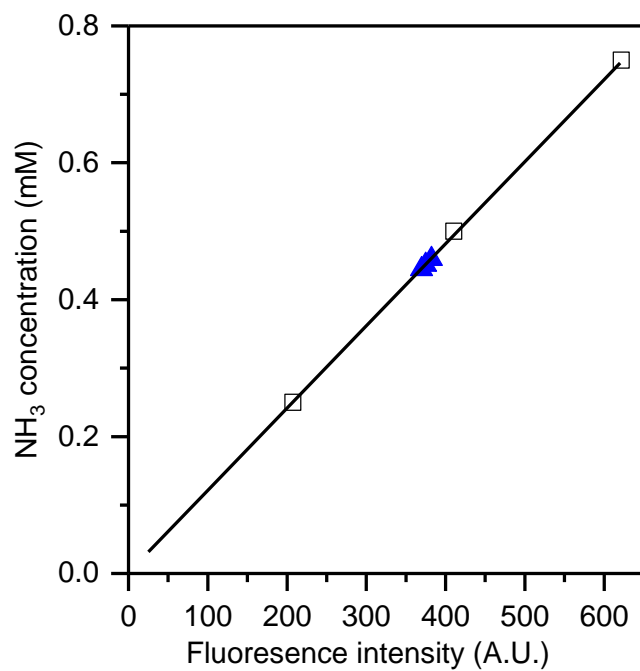

**Fig. S7. Representative fluorescence assay calibration used to determine NH<sub>3</sub> produced.** The empty black square data points correspond to control solutions and filled blue triangle data points correspond to solutions synthesized in the plasma electrolytic system.

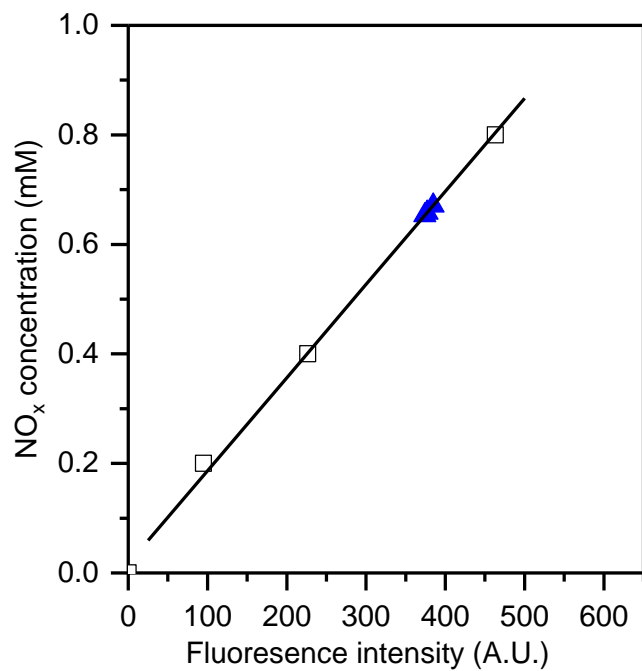

**Fig. S8. Representative fluorescence assay calibration used to determine NO<sub>x</sub> produced.** The empty black square data points correspond to control solutions and the filled blue triangle data points correspond to solutions synthesized in the plasma electrolytic system.

**Table S1A. Summary of NH<sub>3</sub> produced by plasma electrolytic synthesis for the following configurations: N<sub>2</sub> both flowing through the cathode tube where the plasma is normally generated and bubbled through the solution to purge, but no electrical power applied, Ar as both the supply gas in the plasma and purge gas, Ar as the supply gas in the plasma and N<sub>2</sub> as the purge gas, and N<sub>2</sub> as both the supply gas in the plasma and purge gas.** The faradaic efficiencies are calculated when the NH<sub>3</sub> produced was non-zero. The current was 6 mA, the processing time was 45 min, and the reaction volume was 20 ml in all cases.

**No plasma + N<sub>2</sub> purge**

|                | <b>NH<sub>3</sub><br/>produced<br/>(mM)</b> | <b>NH<sub>3</sub><br/>produced<br/>(mg)</b> |
|----------------|---------------------------------------------|---------------------------------------------|
| Trial 1        | 0.000                                       | 0.000                                       |
| Trial 2        | 0.000                                       | 0.000                                       |
| Trial 3        | 0.000                                       | 0.000                                       |
| <b>Average</b> |                                             | <b>0.000±0.000</b>                          |

**Ar plasma + Ar purge**

|                | <b>NH<sub>3</sub><br/>produced<br/>(mM)</b> | <b>NH<sub>3</sub><br/>produced<br/>(mg)</b> |
|----------------|---------------------------------------------|---------------------------------------------|
| Trial 1        | -0.002                                      | 0.000                                       |
| Trial 2        | 0.001                                       | 0.000                                       |
| Trial 3        | 0.000                                       | 0.000                                       |
| <b>Average</b> |                                             | <b>0.000±0.000</b>                          |

**Ar plasma + N<sub>2</sub> purge**

|                | <b>NH<sub>3</sub><br/>produced<br/>(mM)</b> | <b>NH<sub>3</sub><br/>produced<br/>(mg)</b> | <b>Total<br/>charge<br/>(mAs)</b> | <b>Faradaic<br/>NH<sub>3</sub> conc.<br/>(mM)</b> | <b>Faradaic<br/>efficiency<br/>(%)</b> |
|----------------|---------------------------------------------|---------------------------------------------|-----------------------------------|---------------------------------------------------|----------------------------------------|
| Trial 1        | 0.022                                       | 0.007                                       | 16254                             | 2.81                                              | 0.8                                    |
| Trial 2        | 0.172                                       | 0.059                                       | 16227                             | 2.80                                              | 6.1                                    |
| Trial 3        | 0.067                                       | 0.023                                       | 16198                             | 2.80                                              | 2.4                                    |
| Trial 4        | 0.003                                       | 0.001                                       | 16394                             | 2.83                                              | 0.1                                    |
| Trial 5        | 0.144                                       | 0.049                                       | 16252                             | 2.81                                              | 5.1                                    |
| Trial 6        | 0.029                                       | 0.010                                       | 16228                             | 2.80                                              | 1.0                                    |
| <b>Average</b> |                                             | <b>0.025±0.018</b>                          |                                   |                                                   | <b>2.58±1.85</b>                       |

**N<sub>2</sub> plasma + N<sub>2</sub> purge**

|                | <b>NH<sub>3</sub><br/>produced<br/>(mM)</b> | <b>NH<sub>3</sub><br/>produced<br/>(mg)</b> | <b>Total<br/>charge<br/>(mAs)</b> | <b>Faradaic<br/>NH<sub>3</sub> conc.<br/>(mM)</b> | <b>Faradaic<br/>efficiency<br/>(%)</b> |
|----------------|---------------------------------------------|---------------------------------------------|-----------------------------------|---------------------------------------------------|----------------------------------------|
| Trial 1        | 0.919                                       | 0.313                                       | 16240                             | 2.86                                              | 32.1                                   |
| Trial 2        | 0.889                                       | 0.303                                       | 16314                             | 2.87                                              | 30.9                                   |
| Trial 3        | 0.902                                       | 0.307                                       | 16387                             | 2.89                                              | 31.2                                   |
| Trial 4        | 0.929                                       | 0.317                                       | 16288                             | 2.87                                              | 32.4                                   |
| Trial 5        | 0.919                                       | 0.313                                       | 16322                             | 2.88                                              | 31.9                                   |
| Trial 6        | 0.926                                       | 0.315                                       | 16263                             | 2.87                                              | 32.3                                   |
| Trial 7        | 0.896                                       | 0.305                                       | 16253                             | 2.81                                              | 31.9                                   |
| Trial 8        | 0.902                                       | 0.307                                       | 16227                             | 2.80                                              | 32.2                                   |
| Trial 9        | 0.908                                       | 0.309                                       | 16199                             | 2.80                                              | 32.5                                   |
| Trial 10       | 0.990                                       | 0.337                                       | 16394                             | 2.83                                              | 35.0                                   |
| <b>Average</b> |                                             | <b>0.313±0.006</b>                          |                                   |                                                   | <b>32.2±0.6</b>                        |

**Table S1B. Summary of one-sample and two-sample *t* tests carried out on datasets in table S1A.****One-Sample t**Test of  $\mu = 0.00$  vs  $\mu \neq 0.00$ 

|                           | Algebraic<br>Mean | St. Deviation | 95% Lower<br>Bound | Probability |
|---------------------------|-------------------|---------------|--------------------|-------------|
| N <sub>2</sub> plasma     | 0.313             | 0.010         | 0.306              | 0.000       |
| Ar plasma+ N <sub>2</sub> | 0.025             | 0.024         | 0.000              | 0.050       |

**Two-Sample t**Test of  $\mu_1 - \mu_2 = 0$ 

|                                                       | Difference | 95% Lower<br>Bound | 95% Upper<br>Bound | Probability |
|-------------------------------------------------------|------------|--------------------|--------------------|-------------|
| N <sub>2</sub> plasma vs. Ar<br>plasma+N <sub>2</sub> | 0.288      | 0.263              | 0.313              | 0.000       |

**Table S2A. Summary of NH<sub>3</sub> produced and faradaic efficiencies by plasma electrolytic synthesis after different processing times.** The current was 6 mA and the reaction volume was 20 ml in all cases.

| <b>t=5 min</b> |                                             |                                             |                                   |                                                   |                                        |
|----------------|---------------------------------------------|---------------------------------------------|-----------------------------------|---------------------------------------------------|----------------------------------------|
|                | <b>NH<sub>3</sub><br/>produced<br/>(mM)</b> | <b>NH<sub>3</sub><br/>produced<br/>(mg)</b> | <b>Total<br/>charge<br/>(mAs)</b> | <b>Faradaic<br/>NH<sub>3</sub> conc.<br/>(mM)</b> | <b>Faradaic<br/>efficiency<br/>(%)</b> |
| Trial 1        | 0.206                                       | 0.070                                       | 1838                              | 0.317                                             | 64.9                                   |
| Trial 2        | 0.073                                       | 0.025                                       | 1862                              | 0.322                                             | 22.8                                   |
| Trial 3        | 0.339                                       | 0.116                                       | 1832                              | 0.317                                             | 107.1                                  |
| Trial 4        | 0.150                                       | 0.051                                       | 1866                              | 0.322                                             | 46.5                                   |
| <b>Average</b> |                                             | <b>0.065±0.033</b>                          |                                   |                                                   | <b>60.3±30.9</b>                       |

  

| <b>t=15 min</b> |                                             |                                             |                                   |                                                   |                                        |
|-----------------|---------------------------------------------|---------------------------------------------|-----------------------------------|---------------------------------------------------|----------------------------------------|
|                 | <b>NH<sub>3</sub><br/>produced<br/>(mM)</b> | <b>NH<sub>3</sub><br/>produced<br/>(mg)</b> | <b>Total<br/>charge<br/>(mAs)</b> | <b>Faradaic<br/>NH<sub>3</sub> conc.<br/>(mM)</b> | <b>Faradaic<br/>efficiency<br/>(%)</b> |
| Trial 1         | 0.335                                       | 0.114                                       | 5508                              | 0.951                                             | 35.2                                   |
| Trial 2         | 0.285                                       | 0.097                                       | 5532                              | 0.956                                             | 29.8                                   |
| Trial 3         | 0.324                                       | 0.110                                       | 5493                              | 0.949                                             | 34.2                                   |
| Trial 4         | 0.346                                       | 0.118                                       | 5519                              | 0.935                                             | 37.1                                   |
| Trial 5         | 0.461                                       | 0.157                                       | 5511                              | 0.933                                             | 49.4                                   |
| Trial 6         | 0.359                                       | 0.122                                       | 5541                              | 0.938                                             | 38.2                                   |
| <b>Average</b>  |                                             | <b>0.120±0.015</b>                          |                                   |                                                   | <b>37.3±4.9</b>                        |

  

| <b>t=30 min</b> |                                             |                                             |                                   |                                                   |                                        |
|-----------------|---------------------------------------------|---------------------------------------------|-----------------------------------|---------------------------------------------------|----------------------------------------|
|                 | <b>NH<sub>3</sub><br/>produced<br/>(mM)</b> | <b>NH<sub>3</sub><br/>produced<br/>(mg)</b> | <b>Total<br/>charge<br/>(mAs)</b> | <b>Faradaic<br/>NH<sub>3</sub> conc.<br/>(mM)</b> | <b>Faradaic<br/>efficiency<br/>(%)</b> |
| Trial 1         | 0.574                                       | 0.196                                       | 11026                             | 1.905                                             | 30.2                                   |
| Trial 2         | 0.602                                       | 0.205                                       | 11038                             | 1.907                                             | 31.6                                   |
| Trial 3         | 0.529                                       | 0.180                                       | 11014                             | 1.902                                             | 27.8                                   |
| Trial 4         | 0.572                                       | 0.195                                       | 11030                             | 1.905                                             | 30.0                                   |
| <b>Average</b>  |                                             | <b>0.194±0.009</b>                          |                                   |                                                   | <b>29.9±1.3</b>                        |

  

| <b>t=45 min</b> |                                             |                                             |                                   |                                                   |                                        |
|-----------------|---------------------------------------------|---------------------------------------------|-----------------------------------|---------------------------------------------------|----------------------------------------|
|                 | <b>NH<sub>3</sub><br/>produced<br/>(mM)</b> | <b>NH<sub>3</sub><br/>produced<br/>(mg)</b> | <b>Total<br/>charge<br/>(mAs)</b> | <b>Faradaic<br/>NH<sub>3</sub> conc.<br/>(mM)</b> | <b>Faradaic<br/>efficiency<br/>(%)</b> |
| Trial 1         | 0.919                                       | 0.313                                       | 16567                             | 2.86                                              | 32.1                                   |
| Trial 2         | 0.889                                       | 0.303                                       | 16643                             | 2.87                                              | 30.9                                   |
| Trial 3         | 0.902                                       | 0.307                                       | 16717                             | 2.89                                              | 31.2                                   |
| Trial 4         | 0.929                                       | 0.317                                       | 16615                             | 2.87                                              | 32.4                                   |
| Trial 5         | 0.919                                       | 0.313                                       | 16651                             | 2.88                                              | 31.9                                   |
| Trial 6         | 0.926                                       | 0.315                                       | 16590                             | 2.87                                              | 32.3                                   |
| Trial 7         | 0.896                                       | 0.305                                       | 16253                             | 2.81                                              | 31.9                                   |

|                |       |                    |       |      |                 |
|----------------|-------|--------------------|-------|------|-----------------|
| Trial 8        | 0.902 | 0.307              | 16227 | 2.80 | 32.2            |
| Trial 9        | 0.908 | 0.309              | 16199 | 2.80 | 32.5            |
| Trial 10       | 0.990 | 0.337              | 16394 | 2.83 | 35.0            |
| <b>Average</b> |       | <b>0.313±0.006</b> |       |      | <b>32.2±0.6</b> |

| <b>t=300 min</b> |                                             |                                             |                                   |                                                   |                                        |
|------------------|---------------------------------------------|---------------------------------------------|-----------------------------------|---------------------------------------------------|----------------------------------------|
|                  | <b>NH<sub>3</sub><br/>produced<br/>(mM)</b> | <b>NH<sub>3</sub><br/>produced<br/>(mg)</b> | <b>Total<br/>charge<br/>(mAs)</b> | <b>Faradaic<br/>NH<sub>3</sub> conc.<br/>(mM)</b> | <b>Faradaic<br/>efficiency<br/>(%)</b> |
| Trial 1          | 4.68                                        | 1.594                                       | 108648                            | 18.77                                             | 24.9                                   |

**Table S2B. Summary of one-sample and two-sample *t* tests carried out on datasets in table S2A.**

**One-Sample *t* on NH<sub>3</sub> production**

Test of  $\mu = 0.00$  vs  $\mu \neq 0.00$

|        | Algebraic Mean | St. Deviation | 95% Lower<br>Bound | Probability |
|--------|----------------|---------------|--------------------|-------------|
| 5 min  | 0.065          | 0.038         | 0.005              | 0.021       |
| 15 min | 0.120          | 0.020         | 0.099              | 0.000       |
| 30 min | 0.194          | 0.010         | 0.178              | 0.000       |
| 45 min | 0.312          | 0.016         | 0.305              | 0.000       |

**Two-Sample *t* on NH<sub>3</sub> production**

Test of  $\mu_1 - \mu_2 = 0$

|               | Difference | 95% Lower<br>Bound | 95% Upper<br>Bound | Probability |
|---------------|------------|--------------------|--------------------|-------------|
| 5 vs. 15 min  | 0.054      | -0.003             | 0.112              | 0.059       |
| 15 vs. 30 min | 0.074      | 0.051              | 0.097              | 0.000       |
| 30 vs. 45 min | 0.118      | 0.102              | 0.133              | 0.000       |

**One-Sample *t* on FE**

Test of  $\mu = 0.00$  vs  $\mu > 0.00$

|        | Algebraic Mean | St. Deviation | 95% Lower<br>Bound | Probability |
|--------|----------------|---------------|--------------------|-------------|
| 5 min  | 60.3           | 35.6          | 18.4               | 0.021       |
| 15 min | 37.3           | 6.59          | 31.9               | 0.000       |
| 30 min | 29.9           | 1.56          | 28.1               | 0.000       |
| 45 min | 32.1           | 1.70          | 31.5               | 0.000       |

### Two-Sample t on FE

Test of  $\mu_1 - \mu_2 = 0$

|               | Difference | 95% Lower<br>Bound | 95% Upper<br>Bound | Probability |
|---------------|------------|--------------------|--------------------|-------------|
| 5 vs. 15 min  | 23.0       | -80.4              | 34.3               | 0.291       |
| 15 vs. 30 min | 7.42       | 0.23               | 14.6               | 0.045       |
| 30 vs. 45 min | 2.24       | -0.175             | 4.66               | 0.062       |



**Table S3A. Summary of NH<sub>3</sub> produced and faradaic efficiencies by plasma electrolytic synthesis at different currents.** The processing time was 45 min and the reaction volume was 20 ml in all cases.

| <b>I=1 mA</b>  |                                             |                                             |                                   |                                                   |                                        |
|----------------|---------------------------------------------|---------------------------------------------|-----------------------------------|---------------------------------------------------|----------------------------------------|
|                | <b>NH<sub>3</sub><br/>produced<br/>(mM)</b> | <b>NH<sub>3</sub><br/>produced<br/>(mg)</b> | <b>Total<br/>charge<br/>(mAs)</b> | <b>Faradaic<br/>NH<sub>3</sub> conc.<br/>(mM)</b> | <b>Faradaic<br/>efficiency<br/>(%)</b> |
| Trial 1        | 0.456                                       | 0.155                                       | 2709                              | 0.468                                             | 97.4                                   |
| Trial 2        | 0.470                                       | 0.160                                       | 2705                              | 0.467                                             | 100.7                                  |
| Trial 3        | 0.465                                       | 0.158                                       | 2700                              | 0.466                                             | 99.8                                   |
| Trial 4        | 0.463                                       | 0.158                                       | 2732                              | 0.472                                             | 98.1                                   |
| <b>Average</b> |                                             | <b>0.158±0.002</b>                          |                                   |                                                   | <b>99.0±1.3</b>                        |

  

| <b>I=2 mA</b>  |                                             |                                             |                                   |                                                   |                                        |
|----------------|---------------------------------------------|---------------------------------------------|-----------------------------------|---------------------------------------------------|----------------------------------------|
|                | <b>NH<sub>3</sub><br/>produced<br/>(mM)</b> | <b>NH<sub>3</sub><br/>produced<br/>(mg)</b> | <b>Total<br/>charge<br/>(mAs)</b> | <b>Faradaic<br/>NH<sub>3</sub> conc.<br/>(mM)</b> | <b>Faradaic<br/>efficiency<br/>(%)</b> |
| Trial 1        | 0.849                                       | 0.289                                       | 5438                              | 0.939                                             | 90.4                                   |
| Trial 2        | 0.939                                       | 0.320                                       | 5483                              | 0.947                                             | 99.1                                   |
| Trial 3        | 0.944                                       | 0.322                                       | 5448                              | 0.941                                             | 100.3                                  |
| Trial 4        | 1.017                                       | 0.346                                       | 5798                              | 1.002                                             | 101.5                                  |
| Trial 5        | 1.050                                       | 0.358                                       | 5690                              | 0.983                                             | 106.8                                  |
| Trial 6        | 1.043                                       | 0.355                                       | 5643                              | 0.975                                             | 107.0                                  |
| <b>Average</b> |                                             | <b>0.332±0.020</b>                          |                                   |                                                   | <b>100.9±4.6</b>                       |

  

| <b>I=3 mA</b>  |                                             |                                             |                                   |                                                   |                                        |
|----------------|---------------------------------------------|---------------------------------------------|-----------------------------------|---------------------------------------------------|----------------------------------------|
|                | <b>NH<sub>3</sub><br/>produced<br/>(mM)</b> | <b>NH<sub>3</sub><br/>produced<br/>(mg)</b> | <b>Total<br/>charge<br/>(mAs)</b> | <b>Faradaic<br/>NH<sub>3</sub> conc.<br/>(mM)</b> | <b>Faradaic<br/>efficiency<br/>(%)</b> |
| Trial 1        | 0.586                                       | 0.199                                       | 8132                              | 1.405                                             | 41.7                                   |
| Trial 2        | 0.514                                       | 0.175                                       | 8189                              | 1.415                                             | 36.3                                   |
| Trial 3        | 0.431                                       | 0.147                                       | 8072                              | 1.394                                             | 30.9                                   |
| <b>Average</b> |                                             | <b>0.174±0.025</b>                          |                                   |                                                   | <b>36.3±5.1</b>                        |

  

| <b>I=4 mA</b>  |                                             |                                             |                                   |                                                   |                                        |
|----------------|---------------------------------------------|---------------------------------------------|-----------------------------------|---------------------------------------------------|----------------------------------------|
|                | <b>NH<sub>3</sub><br/>produced<br/>(mM)</b> | <b>NH<sub>3</sub><br/>produced<br/>(mg)</b> | <b>Total<br/>charge<br/>(mAs)</b> | <b>Faradaic<br/>NH<sub>3</sub> conc.<br/>(mM)</b> | <b>Faradaic<br/>efficiency<br/>(%)</b> |
| Trial 1        | 0.674                                       | 0.230                                       | 11121                             | 1.921                                             | 35.1                                   |
| Trial 2        | 0.714                                       | 0.243                                       | 11156                             | 1.927                                             | 37.1                                   |
| Trial 3        | 0.664                                       | 0.226                                       | 11015                             | 1.903                                             | 34.9                                   |
| Trial 4        | 0.724                                       | 0.247                                       | 11049                             | 1.909                                             | 37.9                                   |
| Trial 5        | 0.664                                       | 0.226                                       | 11076                             | 1.913                                             | 34.7                                   |
| Trial 6        | 0.719                                       | 0.245                                       | 11076                             | 1.902                                             | 37.8                                   |
| <b>Average</b> |                                             | <b>0.236±0.007</b>                          |                                   |                                                   | <b>36.3±1.1</b>                        |

| <b>I=6 mA</b>  |                                             |                                             |                                   |                                                   |                                        |
|----------------|---------------------------------------------|---------------------------------------------|-----------------------------------|---------------------------------------------------|----------------------------------------|
|                | <b>NH<sub>3</sub><br/>produced<br/>(mM)</b> | <b>NH<sub>3</sub><br/>produced<br/>(mg)</b> | <b>Total<br/>charge<br/>(mAs)</b> | <b>Faradaic<br/>NH<sub>3</sub> conc.<br/>(mM)</b> | <b>Faradaic<br/>efficiency<br/>(%)</b> |
| Trial 1        | 0.919                                       | 0.313                                       | 16567                             | 2.86                                              | 32.1                                   |
| Trial 2        | 0.889                                       | 0.303                                       | 16642                             | 2.87                                              | 30.9                                   |
| Trial 3        | 0.902                                       | 0.307                                       | 16717                             | 2.89                                              | 31.2                                   |
| Trial 4        | 0.929                                       | 0.317                                       | 16615                             | 2.87                                              | 32.4                                   |
| Trial 5        | 0.919                                       | 0.313                                       | 16650                             | 2.88                                              | 31.9                                   |
| Trial 6        | 0.926                                       | 0.315                                       | 16591                             | 2.87                                              | 32.3                                   |
| Trial 7        | 0.896                                       | 0.305                                       | 16253                             | 2.81                                              | 31.9                                   |
| Trial 8        | 0.902                                       | 0.307                                       | 16227                             | 2.80                                              | 32.2                                   |
| Trial 9        | 0.908                                       | 0.309                                       | 16199                             | 2.80                                              | 32.5                                   |
| Trial 10       | 0.990                                       | 0.337                                       | 16394                             | 2.83                                              | 35.0                                   |
| <b>Average</b> |                                             | <b>0.313±0.006</b>                          |                                   |                                                   | <b>32.2±0.6</b>                        |

| <b>I=8 mA</b>  |                                             |                                             |                                   |                                                   |                                        |
|----------------|---------------------------------------------|---------------------------------------------|-----------------------------------|---------------------------------------------------|----------------------------------------|
|                | <b>NH<sub>3</sub><br/>produced<br/>(mM)</b> | <b>NH<sub>3</sub><br/>produced<br/>(mg)</b> | <b>Total<br/>charge<br/>(mAs)</b> | <b>Faradaic<br/>NH<sub>3</sub> conc.<br/>(mM)</b> | <b>Faradaic<br/>efficiency<br/>(%)</b> |
| Trial 1        | 0.962                                       | 0.328                                       | 22063                             | 3.81                                              | 25.2                                   |
| Trial 2        | 0.900                                       | 0.307                                       | 22152                             | 3.83                                              | 23.5                                   |
| Trial 3        | 0.953                                       | 0.325                                       | 22111                             | 3.82                                              | 25.0                                   |
| Trial 4        | 0.877                                       | 0.299                                       | 22028                             | 3.81                                              | 23.0                                   |
| Trial 5        | 0.961                                       | 0.327                                       | 22037                             | 3.81                                              | 25.2                                   |
| Trial 6        | 0.882                                       | 0.300                                       | 22047                             | 3.81                                              | 23.2                                   |
| <b>Average</b> |                                             | <b>0.314±0.010</b>                          |                                   |                                                   | <b>24.2±0.8</b>                        |

**Table S3B. Summary of one-sample and two-sample *t* tests carried out on datasets in table S3A.**

**One-Sample *t* on NH<sub>3</sub> production**

Test of  $\mu = 0.00$  vs  $\mu > 0.00$

|      | <b>Algebraic Mean</b> | <b>St. Deviation</b> | <b>95% Lower<br/>Bound</b> | <b>Probability</b> |
|------|-----------------------|----------------------|----------------------------|--------------------|
| 1 mA | 0.158                 | 0.002                | 0.155                      | 0.000              |
| 2 mA | 0.332                 | 0.027                | 0.310                      | 0.000              |
| 3 mA | 0.174                 | 0.026                | 0.130                      | 0.004              |
| 4 mA | 0.236                 | 0.010                | 0.228                      | 0.000              |
| 6 mA | 0.313                 | 0.010                | 0.307                      | 0.000              |
| 8 mA | 0.314                 | 0.014                | 0.303                      | 0.000              |

**Two-Sample t on NH<sub>3</sub> production**Test of  $\mu_1 - \mu_2 = 0$ 

|            | Difference | 95% Lower Bound | 95% Upper Bound | Probability |
|------------|------------|-----------------|-----------------|-------------|
| 1 vs. 2 mA | 0.174      | 0.146           | 0.202           | 0.000       |
| 2 vs. 3 mA | 0.158      | 0.106           | 0.210           | 0.001       |
| 3 vs. 4 mA | 0.062      | -0.005          | 0.130           | 0.058       |
| 4 vs. 6 mA | 0.077      | 0.065           | 0.088           | 0.000       |
| 6 vs. 8 mA | 0.002      | -0.013          | 0.016           | 0.819       |

**One-Sample t on FE**Test of  $\mu = 100$  vs  $\mu < 100$ 

|      | Algebraic Mean | St. Deviation | 95% Upper Bound | Probability |
|------|----------------|---------------|-----------------|-------------|
| 1 mA | 99.0           | 1.51          | 100.7           | 0.000       |
| 2 mA | 1.01           | 6.12          | 105.9           | 0.000       |
| 3 mA | 36.3           | 5.39          | 45.4            | 0.000       |
| 4 mA | 36.2           | 1.52          | 37.5            | 0.000       |
| 6 mA | 32.2           | 1.08          | 32.9            | 0.000       |
| 8 mA | 24.2           | 1.06          | 25.1            | 0.000       |

**One-Sample t on FE**Test of  $\mu = 0$  vs  $\mu > 0.00$ 

|      | Algebraic Mean | St. Deviation | 95% Lower Bound | Probability |
|------|----------------|---------------|-----------------|-------------|
| 1 mA | 99.0           | 1.51          | 97.2            | 0.000       |
| 2 mA | 1.01           | 6.12          | 95.8            | 0.000       |
| 3 mA | 36.3           | 5.39          | 27.2            | 0.004       |
| 4 mA | 36.2           | 1.52          | 35.0            | 0.000       |
| 6 mA | 32.2           | 1.08          | 31.6            | 0.000       |
| 8 mA | 24.2           | 1.06          | 23.3            | 0.000       |

**Two-Sample t on FE**Test of  $\mu_1 - \mu_2 = 0$ 

|            | Difference | 95% Lower Bound | 95% Upper Bound | Probability |
|------------|------------|-----------------|-----------------|-------------|
| 1 vs. 2 mA | 1.88       | -8.59           | 4.84            | 0.505       |
| 2 vs. 3 mA | 64.6       | 53.5            | 75.6            | 0.000       |
| 3 vs. 4 mA | 0.00       | -13.6           | 13.7            | 0.986       |
| 4 vs. 6 mA | 4.00       | 2.38            | 5.63            | 0.000       |
| 6 vs. 8 mA | 8.05       | 6.82            | 9.28            | 0.000       |

**Table S3C. Summary of H<sub>2</sub> produced in plasma electrolytic reactor by analyzing exhaust gas using GC.**

| <b>I=1 mA</b>     |                  |                                          |                                              |                                           |
|-------------------|------------------|------------------------------------------|----------------------------------------------|-------------------------------------------|
| <b>Time (min)</b> | <b>Peak area</b> | <b>H<sub>2</sub> concentration (ppm)</b> | <b>Instantaneous faradaic efficiency (%)</b> | <b>Cumulative faradaic efficiency (%)</b> |
| 15                | 0                | 0                                        | 100                                          | 100                                       |
| 30                | 0                | 0                                        | 100                                          | 100                                       |
| 45                | 6                | 6                                        | 90.2                                         | 95.1-100                                  |

| <b>I=2 mA</b>     |                  |                                          |                                              |                                           |
|-------------------|------------------|------------------------------------------|----------------------------------------------|-------------------------------------------|
| <b>Time (min)</b> | <b>Peak area</b> | <b>H<sub>2</sub> concentration (ppm)</b> | <b>Instantaneous faradaic efficiency (%)</b> | <b>Cumulative faradaic efficiency (%)</b> |
| 15                | 0                | 0                                        | 100                                          | 100                                       |
| 30                | 34               | 33                                       | 73.0                                         | 86.5-100                                  |
| 45                | 31               | 30                                       | 75.4                                         | 77.9-95.9                                 |

**Table S4A. Summary of NH<sub>3</sub> produced and faradaic efficiencies by plasma electrolytic synthesis in a split cell.** The reaction volume was 20 ml in all cases.

| <b>6 mA, 5 min</b> |                                             |                                             |                                   |                                                   |                                        |
|--------------------|---------------------------------------------|---------------------------------------------|-----------------------------------|---------------------------------------------------|----------------------------------------|
|                    | <b>NH<sub>3</sub><br/>produced<br/>(mM)</b> | <b>NH<sub>3</sub><br/>produced<br/>(mg)</b> | <b>Total<br/>charge<br/>(mAs)</b> | <b>Faradaic<br/>NH<sub>3</sub> conc.<br/>(mM)</b> | <b>Faradaic<br/>efficiency<br/>(%)</b> |
| Trial 1            | 0.042                                       | 0.014                                       | 1803                              | 0.312                                             | 13.5                                   |
| Trial 2            | 0.216                                       | 0.074                                       | 1804                              | 0.312                                             | 69.3                                   |
| Trial 3            | 0.114                                       | 0.039                                       | 1789                              | 0.309                                             | 36.8                                   |
| <b>Average</b>     |                                             | <b>0.042±0.028</b>                          |                                   |                                                   | <b>39.9±26.4</b>                       |

  

| <b>6 mA, 15 min</b> |                                             |                                             |                                   |                                                   |                                        |
|---------------------|---------------------------------------------|---------------------------------------------|-----------------------------------|---------------------------------------------------|----------------------------------------|
|                     | <b>NH<sub>3</sub><br/>produced<br/>(mM)</b> | <b>NH<sub>3</sub><br/>produced<br/>(mg)</b> | <b>Total<br/>charge<br/>(mAs)</b> | <b>Faradaic<br/>NH<sub>3</sub> conc.<br/>(mM)</b> | <b>Faradaic<br/>efficiency<br/>(%)</b> |
| Trial 1             | 0.391                                       | 0.133                                       | 5417                              | 0.936                                             | 41.8                                   |
| Trial 2             | 0.287                                       | 0.098                                       | 5402                              | 0.933                                             | 30.8                                   |
| Trial 3             | 0.447                                       | 0.152                                       | 5489                              | 0.948                                             | 47.2                                   |
| Trial 4             | 0.382                                       | 0.130                                       | 5391                              | 0.931                                             | 41.0                                   |
| Trial 5             | 0.322                                       | 0.110                                       | 5393                              | 0.932                                             | 34.5                                   |
| Trial 6             | 0.362                                       | 0.123                                       | 5402                              | 0.933                                             | 38.8                                   |
| <b>Average</b>      |                                             | <b>0.124±0.014</b>                          |                                   |                                                   | <b>39.0±4.3</b>                        |

  

| <b>6 mA, 30 min</b> |                                             |                                             |                                   |                                                   |                                        |
|---------------------|---------------------------------------------|---------------------------------------------|-----------------------------------|---------------------------------------------------|----------------------------------------|
|                     | <b>NH<sub>3</sub><br/>produced<br/>(mM)</b> | <b>NH<sub>3</sub><br/>produced<br/>(mg)</b> | <b>Total<br/>charge<br/>(mAs)</b> | <b>Faradaic<br/>NH<sub>3</sub> conc.<br/>(mM)</b> | <b>Faradaic<br/>efficiency<br/>(%)</b> |
| Trial 1             | 0.617                                       | 0.210                                       | 10811                             | 1.868                                             | 33.0                                   |
| Trial 2             | 0.592                                       | 0.202                                       | 10842                             | 1.873                                             | 31.6                                   |
| Trial 3             | 0.533                                       | 0.182                                       | 10781                             | 1.862                                             | 28.6                                   |
| <b>Average</b>      |                                             | <b>0.198±0.014</b>                          |                                   |                                                   | <b>31.1±2.1</b>                        |

  

| <b>6 mA, 45 min</b> |                                             |                                             |                                   |                                                   |                                        |
|---------------------|---------------------------------------------|---------------------------------------------|-----------------------------------|---------------------------------------------------|----------------------------------------|
|                     | <b>NH<sub>3</sub><br/>produced<br/>(mM)</b> | <b>NH<sub>3</sub><br/>produced<br/>(mg)</b> | <b>Total<br/>charge<br/>(mAs)</b> | <b>Faradaic<br/>NH<sub>3</sub> conc.<br/>(mM)</b> | <b>Faradaic<br/>efficiency<br/>(%)</b> |
| Trial 1             | 0.874                                       | 0.298                                       | 16265                             | 2.81                                              | 31.1                                   |
| Trial 2             | 0.935                                       | 0.318                                       | 16171                             | 2.79                                              | 33.5                                   |
| Trial 3             | 0.930                                       | 0.317                                       | 16180                             | 2.79                                              | 33.3                                   |
| <b>Average</b>      |                                             | <b>0.311±0.011</b>                          |                                   |                                                   | <b>32.6±1.2</b>                        |

| 4 mA, 45 min   |                                     |                                     |                          |                                           |                               |
|----------------|-------------------------------------|-------------------------------------|--------------------------|-------------------------------------------|-------------------------------|
|                | NH <sub>3</sub><br>produced<br>(mM) | NH <sub>3</sub><br>produced<br>(mg) | Total<br>charge<br>(mAs) | Faradaic<br>NH <sub>3</sub> conc.<br>(mM) | Faradaic<br>efficiency<br>(%) |
| Trial 1        | 0.691                               | 0.235                               | 10791                    | 1.86                                      | 37.1                          |
| Trial 2        | 0.651                               | 0.222                               | 10834                    | 1.87                                      | 34.8                          |
| Trial 3        | 0.686                               | 0.234                               | 10885                    | 1.88                                      | 36.5                          |
| <b>Average</b> |                                     | <b>0.230±0.007</b>                  |                          |                                           | <b>36.1±1.1</b>               |

**Table S4B. Summary of two-sample *t* tests carried out on datasets in table S4A (and tables S2A and S3A).**

**Two-Sample *t* on NH<sub>3</sub> production**  
Test of  $\mu_1 - \mu_2 = 0$

|                          | Difference | 95% Lower<br>Bound | 95% Upper<br>Bound | Probability |
|--------------------------|------------|--------------------|--------------------|-------------|
| 6-5 single vs.<br>split  | 0.028      | -0.072             | 0.128              | 0.437       |
| 6-15 single vs.<br>split | 0.005      | -0.021             | 0.030              | 0.692       |
| 6-30 single vs.<br>split | 0.004      | -0.035             | 0.028              | 0.726       |
| 6-45 single vs.<br>split | 0.002      | -0.030             | 0.033              | 0.837       |
| 4-45 single vs.<br>split | 0.004      | -0.012             | 0.020              | 0.535       |

**Table S5A. Summary of NH<sub>3</sub> produced and faradaic efficiencies by plasma electrolytic synthesis at different pH values.** The pH was controlled by the concentration of sulfuric acid. “MC” refers to the main reaction cell and “Trap” refers to a second trapping vessel where the gas exhaust from the main reaction cell was bubbled through a solution of sulfuric acid at pH=2. The reaction volume was 20 ml in all cases.

| <b>pH=2</b>    |                                             |                                             |                                   |                                                   |                                        |
|----------------|---------------------------------------------|---------------------------------------------|-----------------------------------|---------------------------------------------------|----------------------------------------|
|                | <b>NH<sub>3</sub><br/>produced<br/>(mM)</b> | <b>NH<sub>3</sub><br/>produced<br/>(mg)</b> | <b>Total<br/>charge<br/>(mAs)</b> | <b>Faradaic<br/>NH<sub>3</sub> conc.<br/>(mM)</b> | <b>Faradaic<br/>efficiency<br/>(%)</b> |
| Trial 1        | 1.116                                       | 0.380                                       | 16252                             | 2.81                                              | 39.8                                   |
| Trial 2        | 1.146                                       | 0.390                                       | 16227                             | 2.80                                              | 40.9                                   |
| Trial 3        | 1.104                                       | 0.376                                       | 16199                             | 2.78                                              | 39.5                                   |
| Trial 4        | 1.154                                       | 0.393                                       | 16395                             | 2.83                                              | 40.8                                   |
| <b>Average</b> |                                             | <b>0.385±0.007</b>                          |                                   |                                                   | <b>40.2±0.6</b>                        |

| <b>pH=5.5</b>  |                                             |                                             |                                   |                                                   |                                        |
|----------------|---------------------------------------------|---------------------------------------------|-----------------------------------|---------------------------------------------------|----------------------------------------|
|                | <b>NH<sub>3</sub><br/>produced<br/>(mM)</b> | <b>NH<sub>3</sub><br/>produced<br/>(mg)</b> | <b>Total<br/>charge<br/>(mAs)</b> | <b>Faradaic<br/>NH<sub>3</sub> conc.<br/>(mM)</b> | <b>Faradaic<br/>efficiency<br/>(%)</b> |
| Trial 1        | 0.884                                       | 0.301                                       | 16252                             | 2.81                                              | 31.5                                   |
| Trial 2        | 0.821                                       | 0.280                                       | 16227                             | 2.80                                              | 29.3                                   |
| Trial 3        | 0.834                                       | 0.284                                       | 16198                             | 2.80                                              | 29.8                                   |
| Trial 4        | 0.796                                       | 0.271                                       | 16395                             | 2.83                                              | 28.1                                   |
| <b>Average</b> |                                             | <b>0.284±0.011</b>                          |                                   |                                                   | <b>29.7±1.2</b>                        |

| <b>pH=7</b>    |                                             |                                             |                                   |                                                   |                                        |
|----------------|---------------------------------------------|---------------------------------------------|-----------------------------------|---------------------------------------------------|----------------------------------------|
|                | <b>NH<sub>3</sub><br/>produced<br/>(mM)</b> | <b>NH<sub>3</sub><br/>produced<br/>(mg)</b> | <b>Total<br/>charge<br/>(mAs)</b> | <b>Faradaic<br/>NH<sub>3</sub> conc.<br/>(mM)</b> | <b>Faradaic<br/>efficiency<br/>(%)</b> |
| Trial 1 (MC)   | 0.134                                       | 0.045                                       | 16290                             | 2.81                                              | 4.7                                    |
| Trial 1 (Trap) | 0.041                                       | 0.014                                       | 16290                             | 2.81                                              | 1.5                                    |
| Trial 2 (MC)   | 0.066                                       | 0.022                                       | 16231                             | 2.80                                              | 2.3                                    |
| Trial 2 (Trap) | 0.105                                       | 0.036                                       | 16231                             | 2.80                                              | 3.7                                    |

**Table S5B. Summary of one-sample and two-sample *t* tests carried out on datasets in table S5A.**

“MC” refers to the main reaction cell and “Trap” refers to a second trapping vessel where the gas exhaust from the main reaction cell was bubbled through a solution of sulfuric acid at pH=2.

**One-Sample *t* on NH<sub>3</sub> production**Test of  $\mu = 0$  vs  $\mu > 0.00$ 

|             | Algebraic Mean | St. Deviation | 95% Lower Bound | Probability |
|-------------|----------------|---------------|-----------------|-------------|
| pH 2.0 (MC) | 0.385          | 0.008         | 0.375           | 0.000       |
| pH 3.5 (MC) | 0.313          | 0.010         | 0.307           | 0.000       |
| pH 5.5 (MC) | 0.284          | 0.013         | 0.269           | 0.000       |
| pH 7 (MC)   | 0.034          | 0.016         | -0.039          | 0.104       |
| pH 7 (Trap) | 0.025          | 0.015         | -0.043          | 0.131       |

**Two-Sample *t* on NH<sub>3</sub> production**Test of  $\mu_1 - \mu_2 = 0$ 

|                        | Difference | 95% Lower Bound | 95% Upper Bound | Probability |
|------------------------|------------|-----------------|-----------------|-------------|
| 2.0 (MC) vs. 3.5 (MC)  | 0.072      | 0.060           | 0.085           | 0.000       |
| 3.5 (MC) vs 5.5 (MC)   | 0.029      | 0.048           | 0.009           | 0.015       |
| 5.5 (MC) vs 7.0 (MC)   | 0.250      | 0.083           | 0.417           | 0.033       |
| 7.0 (MC) vs 7.0 (Trap) | 0.009      | -0.210          | 0.192           | 0.668       |

**One-Sample *t* on FE**Test of  $\mu = 0$  vs  $\mu > 0.00$ 

|             | Algebraic Mean | St. Deviation | 95% Lower Bound | Probability |
|-------------|----------------|---------------|-----------------|-------------|
| pH 2.0 (MC) | 40.22          | 0.708         | 39.39           | 0.000       |
| pH 3.5 (MC) | 32.24          | 1.080         | 31.62           | 0.000       |
| pH 5.5 (MC) | 29.67          | 1.404         | 28.02           | 0.000       |
| pH 7 (MC)   | 3.55           | 1.700         | -4.030          | 0.104       |
| pH 7 (Trap) | 2.60           | 1.610         | -4.560          | 0.131       |



**Two-Sample t on FE**  
Test of  $\mu_1 - \mu_2 = 0$

|                        | Difference | 95% Lower Bound | 95% Upper Bound | Probability |
|------------------------|------------|-----------------|-----------------|-------------|
| 2.0 (MC) vs 3.5 (MC)   | 7.978      | 6.844           | 9.113           | 0.000       |
| 3.5 (MC) vs 5.5 (MC)   | 2.569      | 0.402           | 4.736           | 0.030       |
| 5.5 (MC) vs 7.0 (MC)   | 26.13      | 8.470           | 43.79           | 0.034       |
| 7.0 (MC) vs 7.0 (Trap) | 0.950      | -20.04          | 21.93           | 0.669       |

**Table S6A. Summary of NH<sub>3</sub> produced and faradaic efficiencies by plasma electrolytic synthesis in the presence of NO<sub>3</sub> and NO<sub>2</sub> scavengers.** The concentration of NO<sub>3</sub> and NO<sub>2</sub> was controlled by NaNO<sub>3</sub> and NaNO<sub>2</sub>. The reaction volume was 20 ml in all cases.

| <b>10 mM NO<sub>3</sub></b> |                                             |                                             |                                   |                                                   |                                        |
|-----------------------------|---------------------------------------------|---------------------------------------------|-----------------------------------|---------------------------------------------------|----------------------------------------|
|                             | <b>NH<sub>3</sub><br/>produced<br/>(mM)</b> | <b>NH<sub>3</sub><br/>produced<br/>(mg)</b> | <b>Total<br/>charge<br/>(mAs)</b> | <b>Faradaic<br/>NH<sub>3</sub> conc.<br/>(mM)</b> | <b>Faradaic<br/>efficiency<br/>(%)</b> |
| Trial 1                     | 0.779                                       | 0.265                                       | 5409                              | 0.934                                             | 83.3                                   |
| Trial 2                     | 0.797                                       | 0.272                                       | 5437                              | 0.939                                             | 84.9                                   |
| Trial 3                     | 0.727                                       | 0.248                                       | 5402                              | 0.933                                             | 77.9                                   |
| <b>Average</b>              |                                             | <b>0.261±0.011</b>                          |                                   |                                                   | <b>82.0±3.5</b>                        |

  

| <b>100 mM NO<sub>3</sub></b> |                                             |                                             |                                   |                                                   |                                        |
|------------------------------|---------------------------------------------|---------------------------------------------|-----------------------------------|---------------------------------------------------|----------------------------------------|
|                              | <b>NH<sub>3</sub><br/>produced<br/>(mM)</b> | <b>NH<sub>3</sub><br/>produced<br/>(mg)</b> | <b>Total<br/>charge<br/>(mAs)</b> | <b>Faradaic<br/>NH<sub>3</sub> conc.<br/>(mM)</b> | <b>Faradaic<br/>efficiency<br/>(%)</b> |
| Trial 1                      | 0.553                                       | 0.188                                       | 5379                              | 0.929                                             | 59.5                                   |
| Trial 2                      | 0.568                                       | 0.194                                       | 5409                              | 0.934                                             | 60.8                                   |
| Trial 3                      | 0.584                                       | 0.199                                       | 5402                              | 0.933                                             | 62.6                                   |
| <b>Average</b>               |                                             | <b>0.194±0.005</b>                          |                                   |                                                   | <b>61.0±1.5</b>                        |

  

| <b>1 M NO<sub>3</sub></b> |                                             |                                             |                                   |                                                   |                                        |
|---------------------------|---------------------------------------------|---------------------------------------------|-----------------------------------|---------------------------------------------------|----------------------------------------|
|                           | <b>NH<sub>3</sub><br/>produced<br/>(mM)</b> | <b>NH<sub>3</sub><br/>produced<br/>(mg)</b> | <b>Total<br/>charge<br/>(mAs)</b> | <b>Faradaic<br/>NH<sub>3</sub> conc.<br/>(mM)</b> | <b>Faradaic<br/>efficiency<br/>(%)</b> |
| Trial 1                   | 0.330                                       | 0.112                                       | 5419                              | 0.936                                             | 35.3                                   |
| Trial 2                   | 0.314                                       | 0.107                                       | 5428                              | 0.938                                             | 33.4                                   |
| Trial 3                   | 0.322                                       | 0.110                                       | 5411                              | 0.935                                             | 34.5                                   |
| <b>Average</b>            |                                             | <b>0.110±0.003</b>                          |                                   |                                                   | <b>34.4±0.8</b>                        |

  

| <b>2 M NO<sub>3</sub></b> |                                             |                                             |                                   |                                                   |                                        |
|---------------------------|---------------------------------------------|---------------------------------------------|-----------------------------------|---------------------------------------------------|----------------------------------------|
|                           | <b>NH<sub>3</sub><br/>produced<br/>(mM)</b> | <b>NH<sub>3</sub><br/>produced<br/>(mg)</b> | <b>Total<br/>charge<br/>(mAs)</b> | <b>Faradaic<br/>NH<sub>3</sub> conc.<br/>(mM)</b> | <b>Faradaic<br/>efficiency<br/>(%)</b> |
| Trial 1                   | 0.211                                       | 0.072                                       | 5390                              | 0.931                                             | 22.6                                   |
| Trial 2                   | 0.188                                       | 0.064                                       | 5392                              | 0.932                                             | 20.1                                   |
| Trial 3                   | 0.136                                       | 0.046                                       | 5421                              | 0.936                                             | 14.5                                   |
| <b>Average</b>            |                                             | <b>0.061±0.012</b>                          |                                   |                                                   | <b>19.1±3.9</b>                        |

| <b>10 mM NO<sub>2</sub></b> |                                             |                                             |                                   |                                                   |                                        |
|-----------------------------|---------------------------------------------|---------------------------------------------|-----------------------------------|---------------------------------------------------|----------------------------------------|
|                             | <b>NH<sub>3</sub><br/>produced<br/>(mM)</b> | <b>NH<sub>3</sub><br/>produced<br/>(mg)</b> | <b>Total<br/>charge<br/>(mAs)</b> | <b>Faradaic<br/>NH<sub>3</sub> conc.<br/>(mM)</b> | <b>Faradaic<br/>efficiency<br/>(%)</b> |
| Trial 1                     | 0.376                                       | 0.133                                       | 5303                              | 0.916                                             | 41.0                                   |
| Trial 2                     | 0.406                                       | 0.138                                       | 5338                              | 0.922                                             | 44.1                                   |
| Trial 3                     | 0.389                                       | 0.133                                       | 5216                              | 0.901                                             | 43.2                                   |
| <b>Average</b>              |                                             | <b>0.133±0.005</b>                          |                                   |                                                   | <b>42.7±1.5</b>                        |

  

| <b>1 M NO<sub>2</sub></b> |                                             |                                             |                                   |                                                   |                                        |
|---------------------------|---------------------------------------------|---------------------------------------------|-----------------------------------|---------------------------------------------------|----------------------------------------|
|                           | <b>NH<sub>3</sub><br/>produced<br/>(mM)</b> | <b>NH<sub>3</sub><br/>produced<br/>(mg)</b> | <b>Total<br/>charge<br/>(mAs)</b> | <b>Faradaic<br/>NH<sub>3</sub> conc.<br/>(mM)</b> | <b>Faradaic<br/>efficiency<br/>(%)</b> |
| Trial 1                   | 0.026                                       | 0.009                                       | 5314                              | 0.918                                             | 2.9                                    |
| Trial 2                   | 0.037                                       | 0.013                                       | 5319                              | 0.918                                             | 4.1                                    |
| Trial 3                   | 0.032                                       | 0.011                                       | 5030                              | 0.869                                             | 3.7                                    |
| <b>Average</b>            | <b>0.032</b>                                | <b>0.011</b>                                |                                   |                                                   | <b>3.6±5.7</b>                         |

**Table S6B. Summary of one-sample and two-sample *t* tests carried out on datasets in table S6A.**

**One-Sample *t* on NH<sub>3</sub> production**  
Test of  $\mu = 0$  vs  $\mu > 0.00$

|                       | Algebraic Mean | St. Deviation | 95% Lower<br>Bound | Probability |
|-----------------------|----------------|---------------|--------------------|-------------|
| No<br>Scavenger       | 0.313          | 0.010         | 0.307              | 0.000       |
| 10 mM NO <sub>3</sub> | 0.261          | 0.012         | 0.240              | 0.000       |
| 10 mM NO <sub>2</sub> | 0.133          | 0.005         | 0.124              | 0.000       |
| 1 M NO <sub>3</sub>   | 0.110          | 0.003         | 0.105              | 0.000       |
| 1 M NO <sub>2</sub>   | 0.011          | 0.002         | 0.008              | 0.005       |

**Two-Sample *t* on NH<sub>3</sub> production**  
Test of  $\mu_1 - \mu_2 = 0$

|                                                    | Difference | 95% Lower<br>Bound | 95% Upper<br>Bound | Probability |
|----------------------------------------------------|------------|--------------------|--------------------|-------------|
| None vs. 10 mM<br>NO <sub>3</sub>                  | 0.051      | 0.018              | 0.085              | 0.023       |
| 10 mM NO <sub>3</sub> vs.<br>10 mM NO <sub>2</sub> | 0.128      | 0.095              | 0.162              | 0.004       |
| None vs. 1 M<br>NO <sub>3</sub>                    | 0.203      | 0.195              | 0.211              | 0.000       |
| 10 mM NO <sub>3</sub> vs. 1<br>M NO <sub>3</sub>   | 0.152      | 0.120              | 0.184              | 0.002       |
| 1 M NO <sub>3</sub> vs. 1 M<br>NO <sub>2</sub>     | 0.099      | 0.093              | 0.105              | 0.000       |

**Table S7A. Summary of NO<sub>x</sub> produced by plasma electrolytic synthesis after different processing times and at different currents.** The current was 6 mA in the time trials, the processing time was 45 min in the current trials, and the reaction volume was 20 ml in all cases.

|                | NO <sub>x</sub> produced (mM) |              |              |             |
|----------------|-------------------------------|--------------|--------------|-------------|
|                | t = 5 min                     | t = 15 min   | t = 30 min   | t = 45 min  |
| Trial 1        | 0.412                         | 0.654        | 0.951        | 1.18        |
| Trial 2        | 0.438                         | 0.659        | 0.929        | 1.09        |
| Trial 3        | 0.468                         | 0.629        | 0.971        | 1.06        |
| <b>Average</b> | <b>0.439</b>                  | <b>0.647</b> | <b>0.951</b> | <b>1.11</b> |

|                | NO <sub>x</sub> produced (mM) |             |             |             |
|----------------|-------------------------------|-------------|-------------|-------------|
|                | I = 2 mA                      | I = 4 mA    | I = 6 mA    | I = 8 mA    |
| Trial 1        | 0.653                         | 1.04        | 1.18        | 1.13        |
| Trial 2        | 0.671                         | 0.990       | 1.09        | 1.03        |
| Trial 3        | 0.658                         | 1.03        | 1.06        | 1.16        |
| <b>Average</b> | <b>0.661</b>                  | <b>1.02</b> | <b>1.11</b> | <b>1.11</b> |

**Table S7B. Summary of one-sample and two-sample *t* tests carried out on datasets in table S7A.**

**One-Sample *t* on NO<sub>x</sub> production**

Test of  $\mu = 0$  vs  $\mu > 0.00$

|        | Algebraic Mean | St. Deviation | 95% Lower Bound | Probability |
|--------|----------------|---------------|-----------------|-------------|
| 5 min  | 0.439          | 0.028         | 0.392           | 0.001       |
| 15 min | 0.647          | 0.016         | 0.620           | 0.000       |
| 30 min | 0.950          | 0.021         | 0.915           | 0.000       |
| 45 min | 1.11           | 0.062         | 1.005           | 0.001       |

**One-Sample *t* on NO<sub>x</sub> production**

Test of  $\mu = 0$  vs  $\mu > 0.00$

|      | Algebraic Mean | St. Deviation | 95% Lower Bound | Probability |
|------|----------------|---------------|-----------------|-------------|
| 2 mA | 0.661          | 0.009         | 0.645           | 0.000       |
| 4 mA | 1.02           | 0.028         | 0.974           | 0.000       |
| 6 mA | 1.11           | 0.062         | 1.00            | 0.001       |
| 8 mA | 1.11           | 0.068         | 0.992           | 0.001       |

**Two-Sample t on NO<sub>x</sub> production**Test of  $\mu_1 - \mu_2 = 0$ 

|               | Difference | 95% Lower<br>Bound | 95% Upper<br>Bound | Probability |
|---------------|------------|--------------------|--------------------|-------------|
| 5 vs. 15 min  | 0.208      | 0.149              | 0.267              | 0.002       |
| 15 vs. 30 min | 0.303      | 0.255              | 0.352              | 0.000       |
| 30 vs. 45 min | 0.159      | -0.004             | 0.323              | 0.052       |

**Two-Sample t on NO<sub>x</sub> production**Test of  $\mu_1 - \mu_2 = 0$ 

|            | Difference | 95% Lower<br>Bound | 95% Upper<br>Bound | Probability |
|------------|------------|--------------------|--------------------|-------------|
| 2 vs. 4 mA | 0.360      | 0.287              | 0.433              | 0.002       |
| 4 vs. 6 mA | 0.089      | -0.081             | 0.259              | 0.153       |
| 6 vs. 8 mA | 0.003      | -0.166             | 0.173              | 0.954       |

**Table S8. Summary of voltages measured between the plasma cathode and the Pt anode as a function of the plasma current in the plasma electrolytic system.** The plasma was formed in a flow of N<sub>2</sub> gas.

|                | <b>Voltage<br/>(V)</b> |             |             |             |             |             |
|----------------|------------------------|-------------|-------------|-------------|-------------|-------------|
|                | <b>1 mA</b>            | <b>2 mA</b> | <b>3 mA</b> | <b>4 mA</b> | <b>6 mA</b> | <b>8 mA</b> |
| Trial 1        | 508                    | 510         | 503         | 498         | 510         | 505         |
| Trial 2        | 509                    | 514         | 506         | 509         | 502         | 514         |
| Trial 3        | 503                    | 504         | 511         | 506         | 499         | 501         |
| Trial 4        | 511                    | 501         | 508         | 508         | 507         | 497         |
| Trial 5        | 506                    | 503         | 512         | 503         | 501         | 501         |
| Trial 6        | 513                    | 507         | 501         | 508         | 503         | 499         |
| <b>Average</b> | <b>508</b>             | <b>507</b>  | <b>507</b>  | <b>505</b>  | <b>504</b>  | <b>503</b>  |
